# Supplementary material
Source: MDPI journal article supplement (https://www.mdpi.com/2076-3298/10/6/94)
Supplement: s1 [file s1]

Archive with 1 entries (1 files):
- environments-2359240-supplementary.pdf
